# Supplementary material for: Evolution of Antibiotic Tolerance Shapes Resistance Development in Chronic Pseudomonas aeruginosa Infections
Source: PubMed Central journal article supplement (PMC7885114; doi:10.1128/mbio.03482-20), 2021-02-09
Supplement: mBio.03482-20-sf004.pdf [file mBio.03482-20-sf004.pdf]

**Lineage 13**

| Day                                  | 0     | 1     | 2     | 3     | 4     | 5    | 6     | 7     | 8     | 9    | 10 |
|--------------------------------------|-------|-------|-------|-------|-------|------|-------|-------|-------|------|----|
| <b>INTERG PA1554-PA1555</b>          |       |       |       |       |       |      |       |       |       |      |    |
| <b>nuoN (G300D)</b>                  |       |       |       |       |       |      |       |       |       |      |    |
| <b>MIC Tobramycin</b>                | 1     | 1.5   | 1.5   | 1     | 0.6   | 1    | 0.7   | 0.7   | 0.7   | 1    |    |
| <b>MIC Ciprofloxacin</b>             | 0.125 | 0.125 | 0.125 | 0.125 | 0.125 | 0.25 | 0.125 | 0.125 | 0.125 | 0.25 |    |
| <b>% Survival (log<sub>10</sub>)</b> | -2.9  | -0.5  | -2.1  | -1.8  | -3    | -1.8 | 0.2   | 0.6   | -0.01 | -1.2 |    |

**Lineage 14**

|                                      |       |       |       |       |       |       |       |       |       |      |  |
|--------------------------------------|-------|-------|-------|-------|-------|-------|-------|-------|-------|------|--|
| <b>nuoN (G300D)</b>                  |       |       |       |       |       |       |       |       |       |      |  |
| <b>fusA (R680C)</b>                  |       |       |       |       |       |       |       |       |       |      |  |
| <b>fusA (Y552C)</b>                  |       |       |       |       |       |       |       |       |       |      |  |
| <b>fusA (Y630C)</b>                  |       |       |       |       |       |       |       |       |       |      |  |
| <b>cysE (R20R)</b>                   |       |       |       |       |       |       |       |       |       |      |  |
| <b>MIC Tobramycin</b>                | 1     | 2     | 1.5   | 1.5   | 4     | 10    | 4     | 2.5   | 2     | 3.5  |  |
| <b>MIC Ciprofloxacin</b>             | 0.125 | 0.125 | 0.125 | 0.125 | 0.125 | 0.125 | 0.125 | 0.125 | 0.125 | 0.25 |  |
| <b>% Survival (log<sub>10</sub>)</b> | -3.0  | -1.8  | -1.8  | 1     | 0.09  | 0.4   | -0.3  | 0.9   | -0.2  | 0.5  |  |

**Lineage 15**

|                                      |       |       |       |       |       |      |      |      |       |       |  |
|--------------------------------------|-------|-------|-------|-------|-------|------|------|------|-------|-------|--|
| <b>ccoN1 (A193*)</b>                 |       |       |       |       |       |      |      |      |       |       |  |
| <b>nuoN (G300D)</b>                  |       |       |       |       |       |      |      |      |       |       |  |
| <b>fusA (Q678L)</b>                  |       |       |       |       |       |      |      |      |       |       |  |
| <b>MIC Tobramycin</b>                | 1     | 1     | 2.5   | 2.5   | 1.5   | 2    | 1.5  | 10   | 2     | 4     |  |
| <b>MIC Ciprofloxacin</b>             | 0.125 | 0.125 | 0.125 | 0.125 | 0.125 | 0.09 | 0.09 | 0.25 | 0.125 | 0.125 |  |
| <b>% Survival (log<sub>10</sub>)</b> | -3.0  | -1.2  | -2.1  | -1.8  | -2.0  | 1.2  | 0.9  | 0.7  | 0.6   | 0.7   |  |

**Lineage 16**

|                                      |       |       |      |       |      |       |       |       |       |     |  |
|--------------------------------------|-------|-------|------|-------|------|-------|-------|-------|-------|-----|--|
| <b>nuoN (F140 del)</b>               |       |       |      |       |      |       |       |       |       |     |  |
| <b>fusA (R680C)</b>                  |       |       |      |       |      |       |       |       |       |     |  |
| <b>fusA (Q678L)</b>                  |       |       |      |       |      |       |       |       |       |     |  |
| <b>pmrB (M292T)</b>                  |       |       |      |       |      |       |       |       |       |     |  |
| <b>liuC (-)</b>                      |       |       |      |       |      |       |       |       |       |     |  |
| <b>MIC Tobramycin</b>                | 1     | 2     | 4    | 2     | 2    | 2     | 2     | 4     | 4     | 4   |  |
| <b>MIC Ciprofloxacin</b>             | 0.125 | 0.125 | 0.25 | 0.125 | 0.25 | 0.125 | 0.125 | 0.125 | 0.125 | 1   |  |
| <b>% Survival (log<sub>10</sub>)</b> | -3.0  | -0.9  | -0.3 | -0.3  | -0.3 | -2.2  | -1.2  | -0.23 | -0.23 | 0.3 |  |

**Lineage 17**

|                                      |       |       |      |       |      |      |     |     |     |  |  |
|--------------------------------------|-------|-------|------|-------|------|------|-----|-----|-----|--|--|
| <b>PA1549 (-)</b>                    |       |       |      |       |      |      |     |     |     |  |  |
| <b>arr (S444G)</b>                   |       |       |      |       |      |      |     |     |     |  |  |
| <b>fusA (R680C)</b>                  |       |       |      |       |      |      |     |     |     |  |  |
| <b>parS (130L:TPL133 del)</b>        |       |       |      |       |      |      |     |     |     |  |  |
| <b>tufB INTERG</b>                   |       |       |      |       |      |      |     |     |     |  |  |
| <b>gyrA (A119S)</b>                  |       |       |      |       |      |      |     |     |     |  |  |
| <b>MIC Tobramycin</b>                | 1     | 4     | 16   | 4     | 4    | 4    | 8   | 8   | 8   |  |  |
| <b>MIC Ciprofloxacin</b>             | 0.125 | 0.125 | 0.25 | 0.125 | 0.5  | 0.5  | 0.5 | 4   | 32  |  |  |
| <b>% Survival (log<sub>10</sub>)</b> | -3.2  | -0.3  | -0.7 | -1.9  | -1.0 | -0.8 | 1.2 | 1.5 | 1.8 |  |  |

**Lineage 18**

|                                      |       |       |       |      |      |      |      |      |      |  |  |
|--------------------------------------|-------|-------|-------|------|------|------|------|------|------|--|--|
| <b>ccoO1 (L27R)</b>                  |       |       |       |      |      |      |      |      |      |  |  |
| <b>fusA (R680C)</b>                  |       |       |       |      |      |      |      |      |      |  |  |
| <b>parR (E214L)</b>                  |       |       |       |      |      |      |      |      |      |  |  |
| <b>arr (S444G)</b>                   |       |       |       |      |      |      |      |      |      |  |  |
| <b>MIC Tobramycin</b>                | 1     | 2     | 4     | 2    | 2    | 2    | 4    | 4    | 4    |  |  |
| <b>MIC Ciprofloxacin</b>             | 0.125 | 0.125 | 0.125 | 0.25 | 0.25 | 0.25 | 0.5  | 0.5  | 0.5  |  |  |
| <b>% Survival (log<sub>10</sub>)</b> | -3.0  | -2.3  | -1.4  | -2.2 | -2.1 | -2.2 | -1.0 | -1.0 | -0.2 |  |  |

**Lineage 19\***

| Day                                  | 0     | 1     | 2     | 3     | 4     | 5     | 6     | 7    | 8    | 9    |
|--------------------------------------|-------|-------|-------|-------|-------|-------|-------|------|------|------|
| <b>fusA (Q678L)</b>                  |       |       |       |       |       |       |       |      |      |      |
| <b>PA1030</b>                        |       |       |       |       |       |       |       |      |      |      |
| <b>hxcR (V357G)</b>                  |       |       |       |       |       |       |       |      |      |      |
| <b>MIC Tobramycin</b>                | 1     | 1     | 2     | 2     | 2     | 2     | 2     | 2    | 2    | 2    |
| <b>MIC Ciprofloxacin</b>             | 0.125 | 0.125 | 0.125 | 0.125 | 0.125 | 0.125 | 0.125 | 0.25 | 0.25 | 0.25 |
| <b>% Survival (log<sub>10</sub>)</b> | -2.9  | -1.2  | -1.8  | -0.9  | -1.1  | -0.8  | -1.4  | 0.5  | 0.5  | 0.8  |

**Lineage 20**

|                                      |       |       |       |       |      |     |     |     |     |   |  |
|--------------------------------------|-------|-------|-------|-------|------|-----|-----|-----|-----|---|--|
| <b>fusA (T671A)</b>                  |       |       |       |       |      |     |     |     |     |   |  |
| <b>coaD (T71P)</b>                   |       |       |       |       |      |     |     |     |     |   |  |
| <b>gyrA (D87Y)</b>                   |       |       |       |       |      |     |     |     |     |   |  |
| <b>MIC Tobramycin</b>                | 1     | 2     | 2     | 4     | 4    | 4   | 4   | 4   | 4   | 4 |  |
| <b>MIC Ciprofloxacin</b>             | 0.125 | 0.125 | 0.125 | 0.125 | 0.25 | 1   | 1   | 2   | 1   |   |  |
| <b>% Survival (log<sub>10</sub>)</b> | -3.1  | -0.6  | 0.2   | 0.9   | 0.9  | 1.3 | 0.8 | 1.6 | 2.1 |   |  |

**Lineage 21**

|                                      |       |       |       |      |      |       |       |       |       |      |  |
|--------------------------------------|-------|-------|-------|------|------|-------|-------|-------|-------|------|--|
| <b>fusA (Q455R)</b>                  |       |       |       |      |      |       |       |       |       |      |  |
| <b>fusA (T671A)</b>                  |       |       |       |      |      |       |       |       |       |      |  |
| <b>INTERG Fdx1-coaD</b>              |       |       |       |      |      |       |       |       |       |      |  |
| <b>MIC Tobramycin</b>                | 1     | 2     | 2     | 1    | 2    | 2     | 2     | 2     | 4     | 4    |  |
| <b>MIC Ciprofloxacin</b>             | 0.125 | 0.125 | 0.125 | 0.5  | 0.5  | 0.5   | 0.125 | 0.125 | 0.125 | 0.25 |  |
| <b>% Survival (log<sub>10</sub>)</b> | -3.0  | -0.1  | -1.0  | -1.5 | -2.0 | -0.01 | 0.3   | -0.3  | 0.08  | 0.08 |  |

**Lineage 22\***

|                                      |       |       |       |       |      |      |       |       |      |  |  |
|--------------------------------------|-------|-------|-------|-------|------|------|-------|-------|------|--|--|
| <b>ptsP (-)</b>                      |       |       |       |       |      |      |       |       |      |  |  |
| <b>nuoN (G300D)</b>                  |       |       |       |       |      |      |       |       |      |  |  |
| <b>PA1365 (I241V)</b>                |       |       |       |       |      |      |       |       |      |  |  |
| <b>fusA (D327G)</b>                  |       |       |       |       |      |      |       |       |      |  |  |
| <b>rplF (ins G 162)</b>              |       |       |       |       |      |      |       |       |      |  |  |
| <b>MIC Tobramycin</b>                | 1     | 2     | 2     | 1     | 16   | 4    | 4     | 8     | 8    |  |  |
| <b>MIC Ciprofloxacin</b>             | 0.125 | 0.125 | 0.125 | 0.125 | 0.25 | 0.25 | 0.125 | 0.125 | 0.5  |  |  |
| <b>% Survival (log<sub>10</sub>)</b> | -3.0  | -0.9  | -1.3  | 0.8   | 0.05 | -0.3 | 0.3   | 0.3   | -0.1 |  |  |

**Lineage 23**

|                                      |       |       |       |       |       |       |       |       |       |     |  |
|--------------------------------------|-------|-------|-------|-------|-------|-------|-------|-------|-------|-----|--|
| <b>ccmF (del 403MAAL407)</b>         |       |       |       |       |       |       |       |       |       |     |  |
| <b>PA4431 (-)</b>                    |       |       |       |       |       |       |       |       |       |     |  |
| <b>fusA (N12S)</b>                   |       |       |       |       |       |       |       |       |       |     |  |
| <b>mexZ (-)</b>                      |       |       |       |       |       |       |       |       |       |     |  |
| <b>MIC Tobramycin</b>                | 1     | 1     | 2     | 2     | 2     | 2     | 4     | 4     | 8     | 8   |  |
| <b>MIC Ciprofloxacin</b>             | 0.125 | 0.125 | 0.125 | 0.125 | 0.125 | 0.125 | 0.125 | 0.125 | 0.125 | 1   |  |
| <b>% Survival (log<sub>10</sub>)</b> | -3.2  | -2.1  | -1.0  | -1.2  | -1.7  | -0.9  | 1.2   | 1.2   | 1.2   | 1.3 |  |

**Lineage 24**

|                                      |       |       |       |       |       |       |       |      |      |     |  |
|--------------------------------------|-------|-------|-------|-------|-------|-------|-------|------|------|-----|--|
| <b>ccoP1 (-)</b>                     |       |       |       |       |       |       |       |      |      |     |  |
| <b>nuoG (W648*)</b>                  |       |       |       |       |       |       |       |      |      |     |  |
| <b>fusA (Q678L)</b>                  |       |       |       |       |       |       |       |      |      |     |  |
| <b>tufB INTERG</b>                   |       |       |       |       |       |       |       |      |      |     |  |
| <b>MIC Tobramycin</b>                | 1     | 2     | 2     | 2     | 2     | 2     | 2     | 4    | 4    | 4   |  |
| <b>MIC Ciprofloxacin</b>             | 0.125 | 0.125 | 0.125 | 0.125 | 0.125 | 0.125 | 0.125 | 0.25 | 0.25 | 0.5 |  |
| <b>% Survival (log<sub>10</sub>)</b> | -3.0  | -1.9  | -2.2  | -1.7  | -1.4  | -1.3  | -0.5  | 0.5  | 1.5  | 1.9 |  |

**Lineage 25**

|                                      |       |       |       |       |       |       |       |       |     |     |  |
|--------------------------------------|-------|-------|-------|-------|-------|-------|-------|-------|-----|-----|--|
| <b>ccmG (V48*)</b>                   |       |       |       |       |       |       |       |       |     |     |  |
| <b>parR (M59I)</b>                   |       |       |       |       |       |       |       |       |     |     |  |
| <b>MIC Tobramycin</b>                | 1     | 1     | 1     | 1     | 1     | 2     | 2     | 2     | 4   | 4   |  |
| <b>MIC Ciprofloxacin</b>             | 0.125 | 0.125 | 0.125 | 0.125 | 0.125 | 0.125 | 0.125 | 0.125 | 0.5 | 1   |  |
| <b>% Survival (log<sub>10</sub>)</b> | -3.1  | -3.4  | -3.1  | -2.8  | -3    | 0.1   | 0.01  | -1.1  | 1.2 | 1.5 |  |
