# Supplementary material for: Evolution of Antibiotic Tolerance Shapes Resistance Development in Chronic Pseudomonas aeruginosa Infections
Source: PubMed Central journal article supplement (PMC7885114; doi:10.1128/mbio.03482-20), 2021-02-09
Supplement: mBio.03482-20-sf005.pdf [file mBio.03482-20-sf005.pdf]

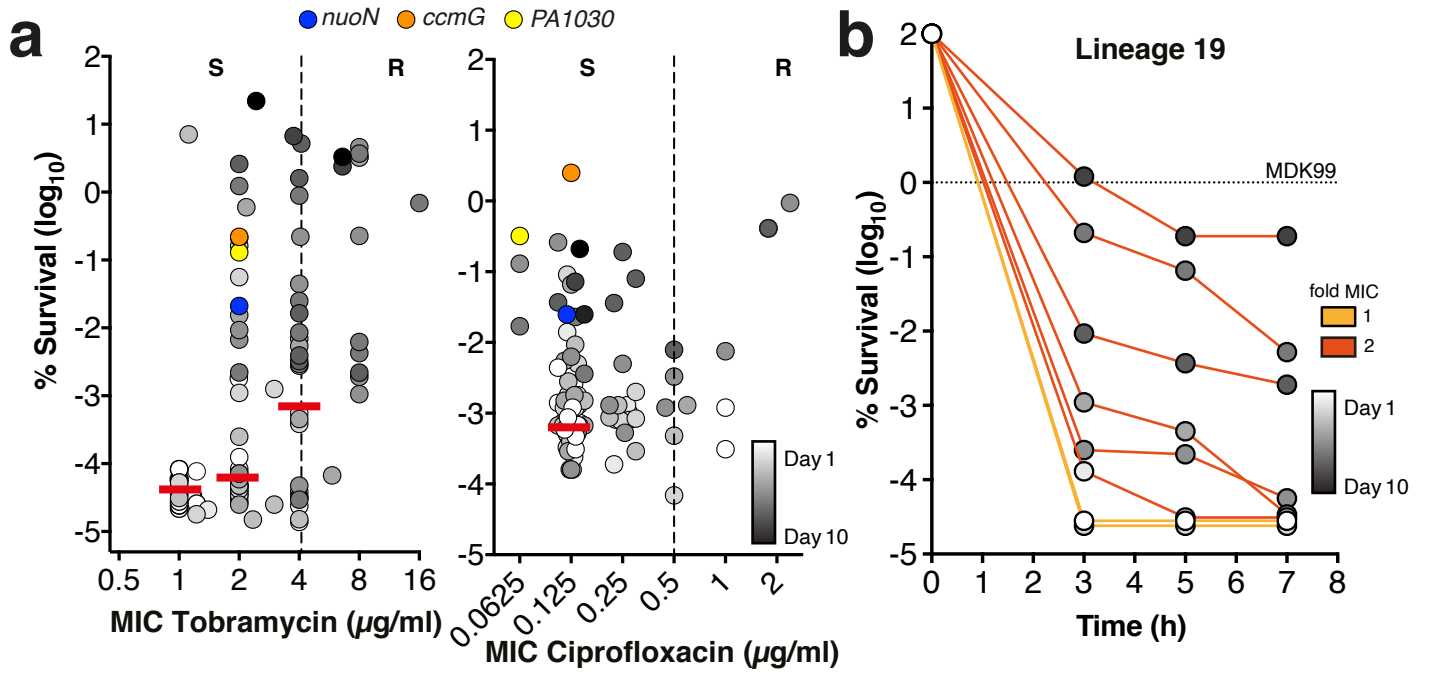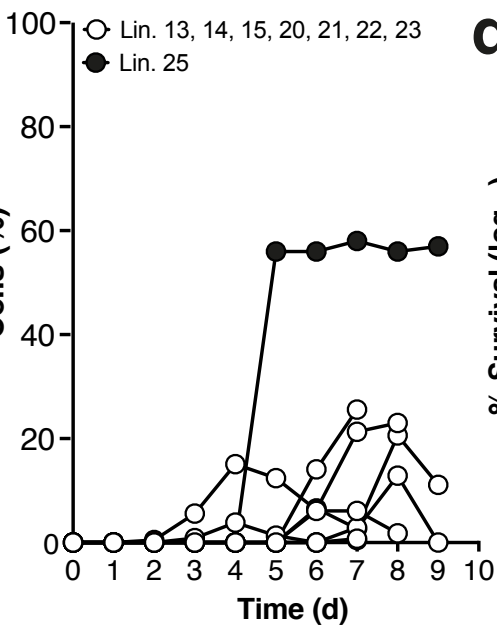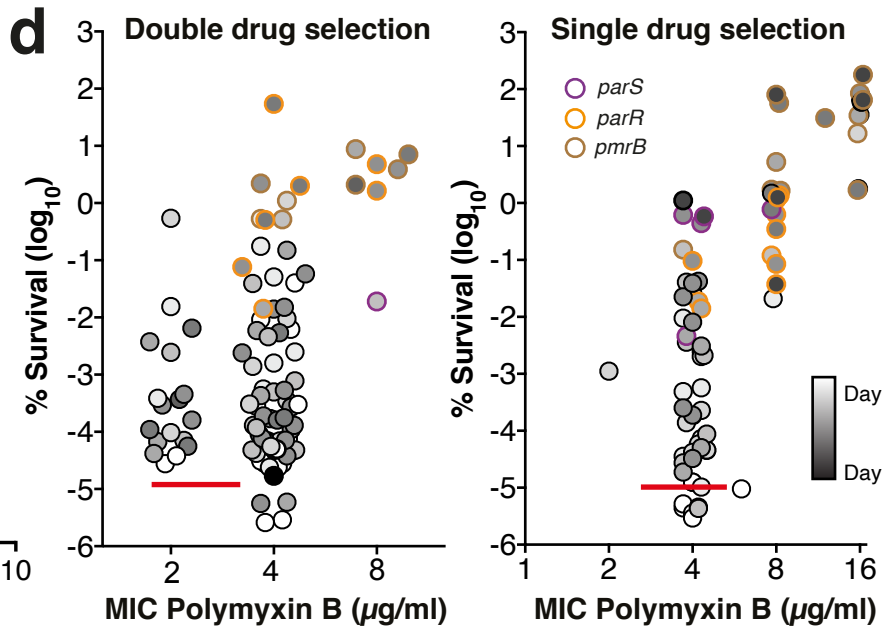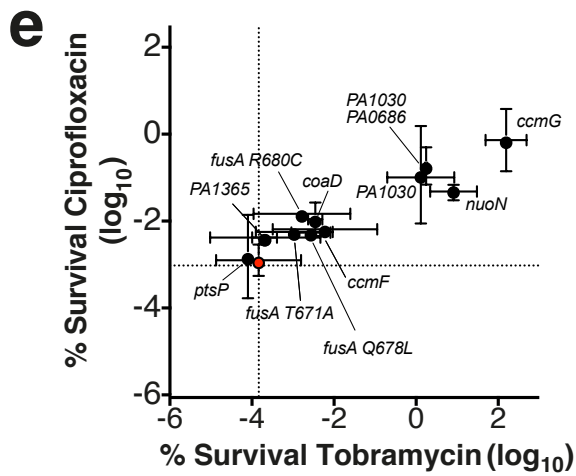

| Gene                 | MIC ( $\mu\text{g/ml}$ ) |               |
|----------------------|--------------------------|---------------|
|                      | Tobramycin               | Ciprofloxacin |
| <i>ccmG</i>          | 2                        | 0.062         |
| <i>nuoN</i>          | 2                        | 0.125         |
| <i>PA1030</i>        | 2                        | 0.062         |
| <i>PA1030 PA0686</i> | 2                        | 0.062         |
| <i>coaD</i>          | 2                        | 0.25          |
| <i>ccmF</i>          | 2                        | 0.125         |
| <i>PA1365</i>        | 1                        | 0.125         |
| <i>ptsP</i>          | 1                        | 0.125         |
| <i>fusA T671A</i>    | 3                        | 0.125         |
| <i>fusA Q678L</i>    | 3                        | 0.125         |
| <i>fusA R680C</i>    | 3                        | 0.125         |
