# Supplementary material for: Evolution of Antibiotic Tolerance Shapes Resistance Development in Chronic Pseudomonas aeruginosa Infections
Source: PubMed Central journal article supplement (PMC7885114; doi:10.1128/mbio.03482-20), 2021-02-09

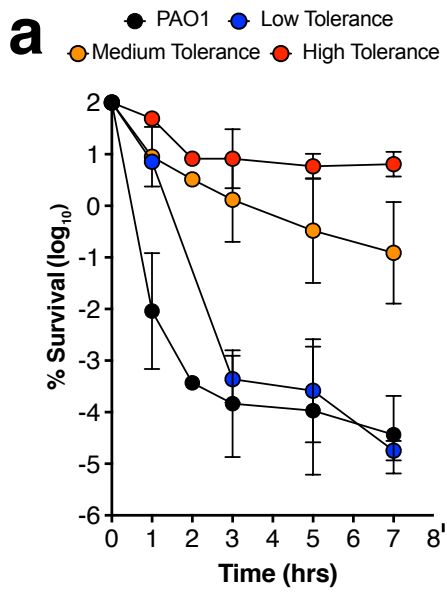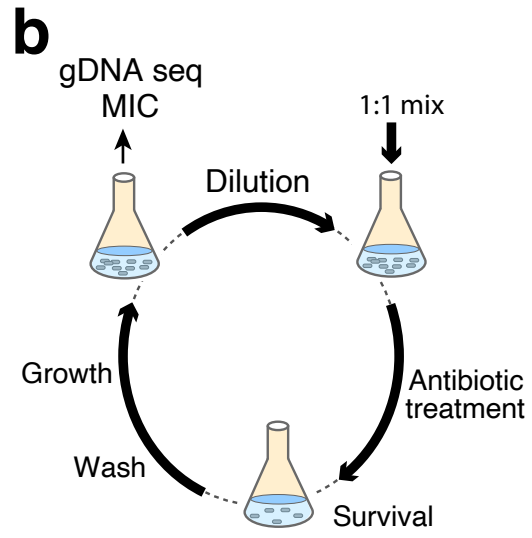

Supplement: mBio.03482-20-sf006.pdf [file mBio.03482-20-sf006.pdf]
