# Supplementary material for: Evolution of Antibiotic Tolerance Shapes Resistance Development in Chronic Pseudomonas aeruginosa Infections
Source: PubMed Central journal article supplement (PMC7885114; doi:10.1128/mbio.03482-20), 2021-02-09

# Patient 1

common to all the strains

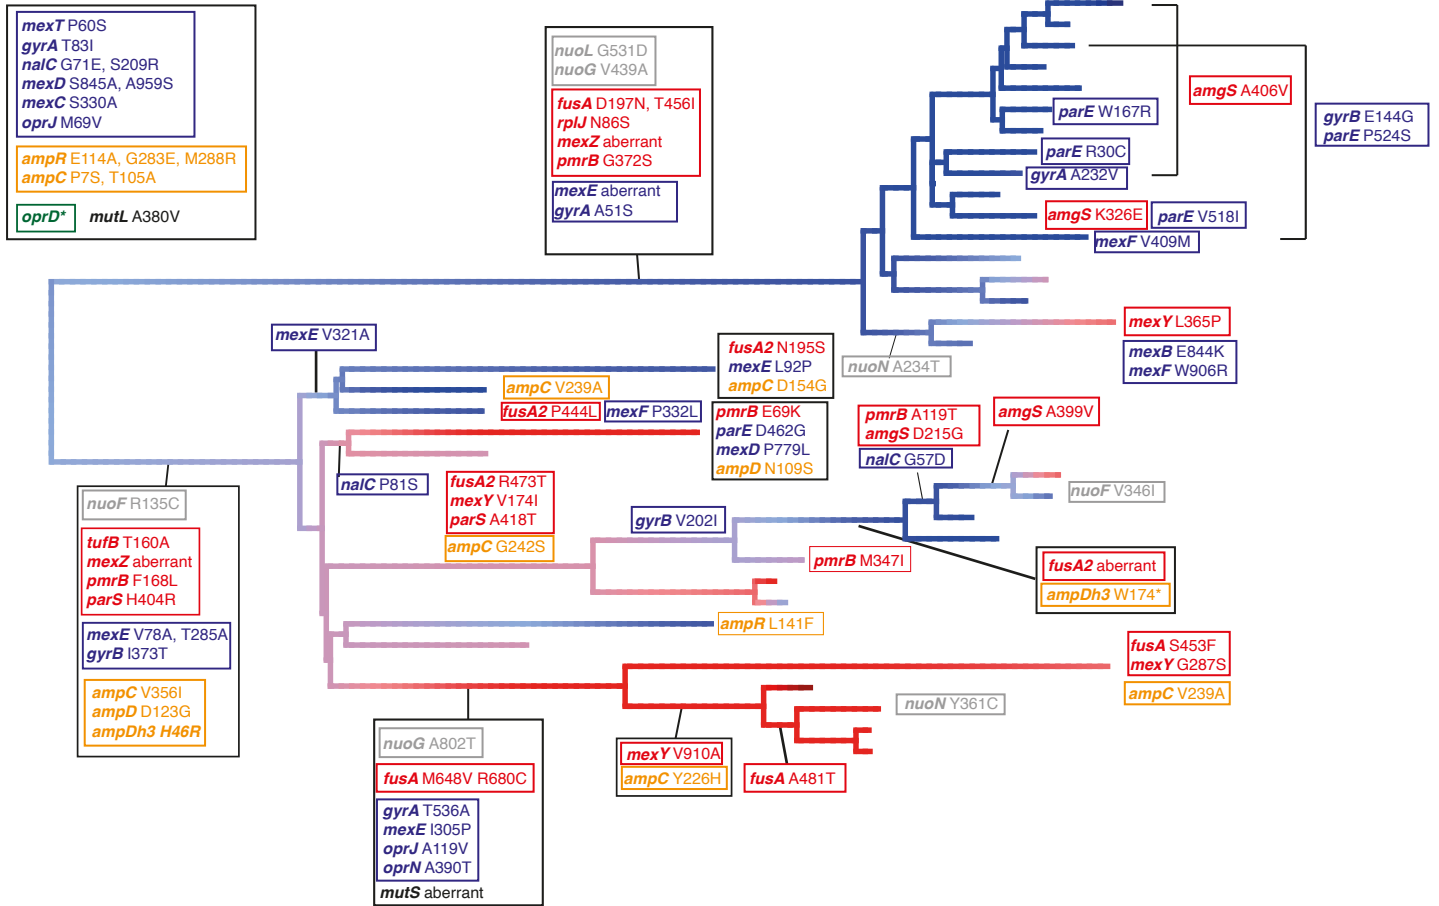

# Patient 2

common to the branch A

common to all the strains

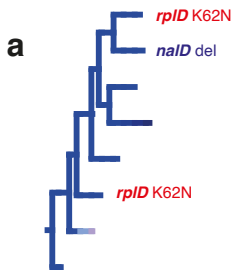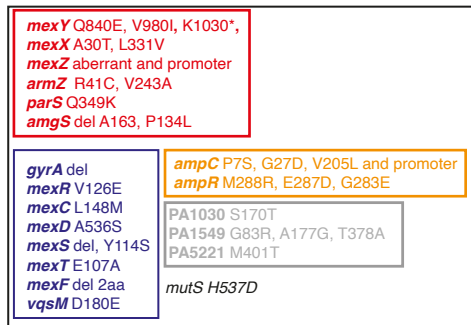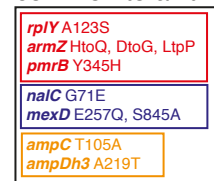

common to the branch B

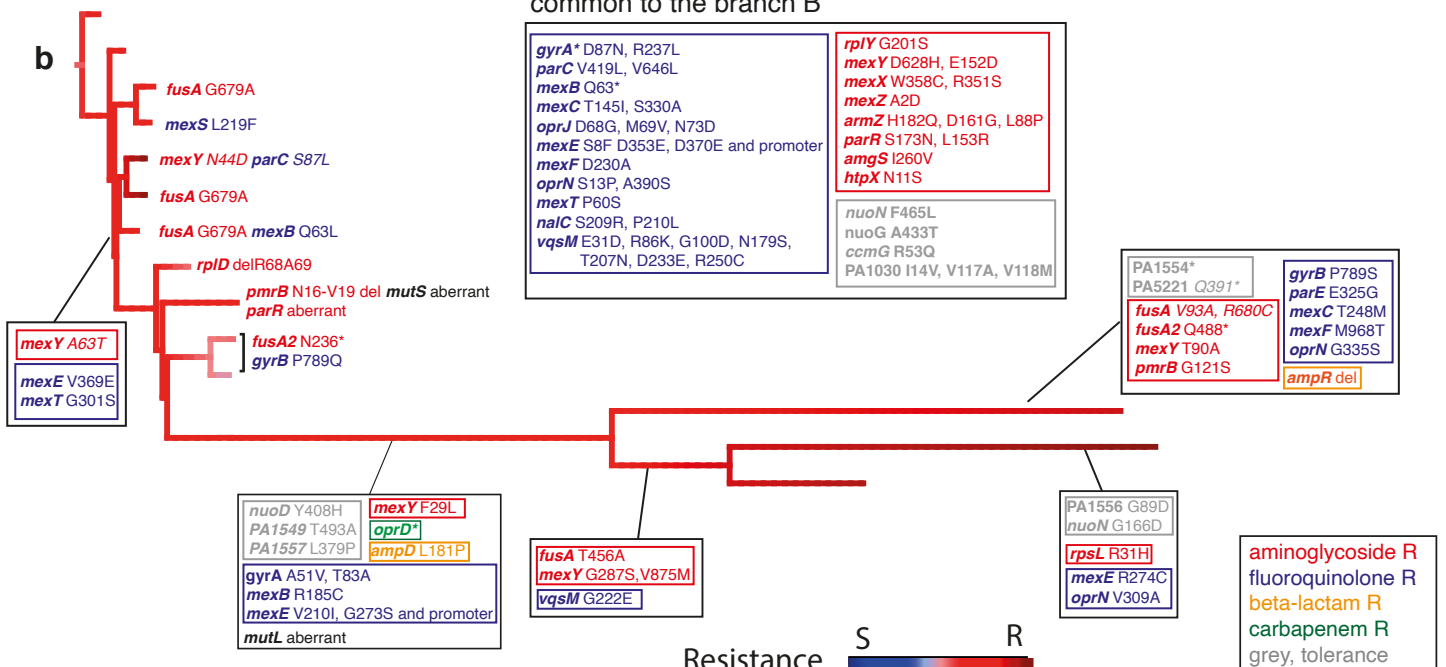

Supplement: mBio.03482-20-sf008.pdf [file mBio.03482-20-sf008.pdf]
